# Supplementary material
Source: HighWire-hosted journal article supplement (https://cmaj.ca/highwire/filestream/68725/field_highwire_adjunct_files/2/160816-res-3-at.pdf)
Supplement: 160816-res-3-at.pdf [file 160816-res-3-at.pdf]

**Appendix 3 (as supplied by the authors): Self-Harm Cohort: Descriptive Statistics Pre- and Post-Intervention**

|                                                         | Pre-Intervention |        |        |        | Post-Intervention |        |        |        |         |
|---------------------------------------------------------|------------------|--------|--------|--------|-------------------|--------|--------|--------|---------|
|                                                         | No Visit         |        | Visit  |        | No Visit          |        | Visit  |        |         |
| Observations<br>(patients)                              | 19,188           |        | 11,664 |        | 28,463            |        | 19,060 |        |         |
|                                                         | Mean             | SD     | Mean   | SD     | Mean              | SD     | Mean   | SD     |         |
| Female                                                  | .522             | .500   | .617   | .486   | .532              | .499   | .635   | .481   |         |
| Age                                                     | 36.41            | 16.21  | 37.12  | 15.07  | 36.35             | 16.79  | 35.69  | 16.08  |         |
| Neighbourhood Income Quintile                           |                  |        |        |        |                   |        |        |        |         |
|                                                         | 1                | .304   | .460   | .297   | .457              | .298   | .457   | .278   | .448    |
|                                                         | 2                | .216   | .412   | .211   | .408              | .218   | .413   | .208   | .406    |
|                                                         | 3                | .170   | .376   | .164   | .370              | .180   | .385   | .180   | .384    |
|                                                         | 4                | .161   | .367   | .166   | .372              | .162   | .369   | .173   | .378    |
|                                                         | 5                | .139   | .346   | .157   | .364              | .142   | .349   | .161   | .367    |
| Missing                                                 |                  | .010   | .099   | .005   | .073              | .011   | .104   | .006   | .075    |
| Resource Utilization Band Score*                        |                  |        |        |        |                   |        |        |        |         |
|                                                         | 0                | .069   | .253   | .018   | .133              | .069   | .253   | .018   | .133    |
|                                                         | 1                | .041   | .198   | .010   | .098              | .041   | .199   | .011   | .104    |
|                                                         | 2                | .148   | .355   | .073   | .260              | .147   | .353   | .083   | .277    |
|                                                         | 3                | .448   | .497   | .472   | .499              | .443   | .497   | .455   | .498    |
|                                                         | 4                | .185   | .388   | .260   | .439              | .183   | .387   | .260   | .439    |
|                                                         | 5                | .110   | .313   | .167   | .373              | .117   | .321   | .173   | .378    |
| Num. Aggregated Diagnosis Groups*                       |                  | 5.526  | 3.900  | 7.206  | 4.068             | 5.555  | 3.966  | 7.268  | 4.175   |
| Num. Mental Health Primary Care Billings in Prev. Year  |                  | 5.171  | 25.323 | 14.879 | 76.617            | 4.947  | 24.858 | 16.084 | 85.124  |
| Num. Non-Mental Health Primary Care Billings Prev. Year |                  | 10.077 | 30.819 | 22.722 | 91.099            | 13.490 | 52.234 | 29.167 | 127.866 |
| Num. Psychiatrist Billings Prev. Year                   |                  | 1.906  | 15.421 | 27.596 | 151.814           | 3.132  | 28.020 | 35.769 | 209.709 |
| Num. Psychiatric Admissions Prev. Year                  |                  | .005   | .075   | .012   | .115              | .003   | .063   | .013   | .121    |

\* Source: The Johns Hopkins ACG® System Ver 10.
